1 **Title page**

2 **Title:** Facultative adjustment of paternal care in the face of female infidelity in dunnocks.

3 **Authors' names:** Eduardo S. A. Santos<sup>1,2\*</sup> and Shinichi Nakagawa<sup>1,3</sup>

4 **Affiliations:** <sup>1</sup> Department of Zoology, 340 Great King Street, University of Otago, Dunedin, New

5 Zealand. <sup>2</sup> BECO do Departamento de Zoologia, Universidade de São Paulo, São Paulo, Brazil. <sup>3</sup>

6 Evolution & Ecology Research Centre and School of Biological, Earth and Environmental Sciences,

7 University of New South Wales, Sydney, Australia.

8

9 **Keywords:** extra-pair paternity; extra-group paternity; mating systems; certainty of paternity; parental  
10 investment; *Prunella modularis*.

11

12 \* **Correspondence:** Eduardo S. A. Santos

13 BECO do Departamento de Zoologia, Rua do Matão, Travessa 14, n° 101, Cidade Universitária, São

14 Paulo, 05508-090, Brazil. E-mail: eduardo.sa.santos@ib.usp.br; phone: + 55 (11) 3091-0989, fax: +55

15 (11) 3091-7802.

16

17 **Running title:** Within-male adjustment of paternal care

18 **Abstract**

19 A much-debated issue is whether or not males should reduce parental care when they lose paternity  
20 (i.e. the certainty of paternity hypothesis). While there is general support for this relationship across  
21 species, within-population evidence is still contentious. Among the main reasons behind such problem  
22 is the confusion discerning between- from within-individual patterns. Here, we tested this hypothesis  
23 empirically by investigating the parental care of male dunnocks (*Prunella modularis*) in relation to  
24 paternity. We used a thorough dataset of observations in a wild population, genetic parentage, and a  
25 within-subject centring statistical approach to disentangle paternal care adjustment within-male and  
26 between males. We found support for the certainty of paternity hypothesis, as there was evidence for  
27 within-male adjustment in paternal care when socially monogamous males lost paternity to extra-pair  
28 sires. There was little evidence of a between-male effect overall. Our findings show that monogamous  
29 males adjust paternal care when paired to the same female partner. We also show that – in  
30 monogamous broods – the proportion of provisioning visits made by males yields fitness benefits in  
31 terms of fledging success. Our results suggest that socially monogamous females that engage in extra-  
32 pair behaviour may suffer fitness costs, as their partners' reduction in paternal care can negatively  
33 affect fledging success.

34

## 35 **Introduction**

36 Parental investment is stated as an investment by the parent in the young that increases the young's  
37 chance of survival at a cost to the parent's future ability to invest in other offspring (Trivers 1972;  
38 Smiseth et al. 2012). Thus, an individual should only invest into providing parental care when the  
39 fitness benefits are greater than the costs. The amount of care that a parent should provide is  
40 constrained by a series of factors, but mostly by factors that affect the reproductive value of current  
41 young, and factors that affect the residual reproductive value of parents (Klug et al. 2012). From a  
42 male parent perspective, the reproductive value of a brood should depend on the benefit that the  
43 offspring will gain from his paternal care conditional on the relatedness between the offspring and  
44 himself; a relationship known as Hamilton's rule (Hamilton 1964a; Hamilton 1964b). However, the  
45 male's relatedness to offspring in a brood is frequently uncertain, as females often produce extra-pair  
46 offspring. Extra-pair paternity is a common phenomenon across animals (e.g., reptiles: reviewed by  
47 Uller and Olsson 2008; fish: reviewed by Coleman and Jones 2011, and it has been extensively  
48 investigated in birds, reviewed by Griffith et al. 2002). Given the costs that parental care should exert  
49 (Royle et al. 2012), the amount of paternal care should be related to a male's certainty of paternity  
50 (Trivers 1972). This intuitive relationship has received large theoretical and empirical attention  
51 (reviewed in Sheldon 2002; Griffin et al. 2013; Forstmeier et al. 2014; Schroeder et al. 2016), but the  
52 results have been ambiguous.

53 Different types of theoretical models have three main predictions concerning the intra-specific  
54 question of whether males should adjust paternal care when paternity is uncertain. First, an initial set  
55 of models predicted that loss of paternity may seldom or rarely influence paternal care (Maynard  
56 Smith 1978; Grafen 1980). These early models assumed that there is no paternity evaluation, and the  
57 only cost of paternal care is time-out from the mating pool. A second group of models predicted that  
58 males should decrease their total paternal care towards a brood when certainty of paternity is low (Xia  
59 1992; Whittingham et al. 1992; Westneat and Sherman 1993). These models assumed that males have  
60 the capacity of assessing their paternity. The third and final group of models predicted that loss of

61 paternity may not only reduce paternal care, but it may also lead to discrimination against non-kin,  
62 which would incur in changes in allocation towards individual offspring (Westneat and Sherman 1993;  
63 Johnstone 1997).

64 Numerous empirical studies have tested whether a negative relationship between paternal care  
65 and loss of paternity exists (hereafter, the certainty of paternity hypothesis) (reviewed in Griffin et al.  
66 2013). While there is general meta-analytic support for the certainty of paternity hypothesis (Griffin et  
67 al. 2013), there is also unexplained variation that may be caused by the sampling design of the study.  
68 The discussions on what approaches are most appropriate to examine the certainty of paternity  
69 hypothesis were published almost 20 years ago (Kempnaers and Sheldon 1997; Kempnaers and  
70 Sheldon 1998; Lifjeld et al. 1998; Wagner et al. 1998; Sheldon 2002), but are still pertinent given the  
71 large variation reported recently (Griffin et al. 2013). Kempnaers and Sheldon (1997), and Sheldon  
72 (2002) suggested that in order to reduce the effect of confounding factors, and to appropriately test the  
73 certainty of paternity hypothesis, two approaches should be used: 1) the analysis of sequential  
74 breeding attempts by the same male-female pair, or 2) experimental studies that remove/detain mated  
75 males or females during the fertile period of the female. Almost certainly due to logistic difficulties of  
76 the first approach, most studies to date have examined the certainty of paternity hypothesis either  
77 using simple correlational or experimental evidence across broods from different pairs (see Griffin et  
78 al. 2013 for a recent meta-analysis that includes both types of studies; and see Schroeder et al. 2016  
79 for an example of the first approach).

80 The aim of this study was to test whether males reduce their paternal care (i.e. certainty of  
81 paternity hypothesis) or not when their share of paternity decreases in a brood. To achieve this aim, we  
82 conducted a field study that replicated the seminal investigation by Burke et al. (1989) of paternity and  
83 paternal care in the dunnock, *Prunella modularis*, using a population introduced into New Zealand.  
84 Dunnocks breed in ‘cooperatively’ polyandrous groups, and females copulate with several males; both  
85 their social partners and extra-group males (Burke et al. 1989; Santos et al. 2015a). It has been shown  
86 (Davies 1992) that male dunnocks provide paternal care in relation to their share of mating access with

87 a female. More specifically, this only occurred in polyandrous and polygynandrous groups when a  
88 second male also fed the young (Davies 1992). Thus, male dunnocks are likely to have been selected  
89 to perceive their certainty of paternity. We investigated whether variation in paternal care (within-  
90 male and between-males, and within-pair and between-pairs) is associated with levels of paternity  
91 using a simple statistical approach, within-subject centring (see van de Pol and Wright 2009). We also  
92 estimated the repeatability of paternal care as a further test of whether males alter their levels of care  
93 between different breeding attempts in which paternity often differed. Moreover, we investigated  
94 whether levels of paternal care yielded benefits to current offspring or costs to the males that provided  
95 care.

## 96 **Materials and methods**

### 97 **General procedures**

98 Dunnocks have a complex and variable social mating system, with birds from the same population  
99 breeding in socially monogamous, polyandrous, polygynous or polygynandrous groups (Davies 1992;  
100 Santos and Nakagawa 2013). We studied a population of dunnocks in a 7-hectare area of the Dunedin  
101 Botanic Garden, Dunedin, New Zealand, during three breeding seasons (September to January, 2009-  
102 2012). Dunnocks were introduced into New Zealand in the 19<sup>th</sup> century, and approximately 185  
103 individuals were released around Dunedin (see Santos 2012; Moulton et al. 2014, but see Pipek et al.  
104 2015). Effective population size at our study site has been estimated at 54 breeding individuals (Santos  
105 et al. 2013). All adults and nestlings were individually colour ringed (nestlings: day 9), and blood  
106 sampled under the Animal Ethics Committee of the University of Otago, permit no. 08/09 and the  
107 New Zealand National Bird Banding Scheme Institutional Permit to Band Birds no. 2008/075.

### 108 **Genotyping and assignment of paternity**

109 To determine paternity, we screened the genotypes of individuals using a set of 16 polymorphic  
110 microsatellite loci (for further details of molecular methods see Santos et al. 2015a, and Santos et al.  
111 2015b). We assigned paternity using *MasterBayes* version 2.47 (Hadfield et al. 2006) (see Santos et al.

112 2015a for details). Overall, irrespective of social group composition, *MasterBayes* assigned 17.0%  
113 (49/288) of chicks as extra-group young (EGY), and 26.5% of broods (26/98) contained  $\geq 1$  EGY. Of  
114 the chicks of socially monogamous pairs, 23.3% (32/137) were assigned as EGY, whereas only 9.9%  
115 (14/143) of the chicks of socially polyandrous groups were assigned as EGY. Within polyandrous  
116 groups, subordinate males sired 44.0% (63/143) of chicks (Santos et al. 2015a).

### 117 **Measuring paternal care**

118 We identified members and characterized the social group composition by conducting thorough  
119 behavioural observations within each territory (further details of behavioural work in Santos and  
120 Nakagawa 2013). The dominance status of co-breeding males was inferred from behavioural  
121 observations of displacement at feeding sites, singing perches and from the vicinity of the group's  
122 female. We recorded nestling provisioning behaviour using GoPro Hero HD cameras with 16 GB  
123 memory cards. Video cameras were set at 10 to 15 cm from the nest rim focusing into the nest cup.  
124 We filmed nests on two consecutive days (nestlings age: 8 and 9 days). Chick age had very little, and  
125 non-significant, effect on paternal care, thus it was not included in the final analyses ( $\beta_{(\text{slope of chick age})} =$   
126 0.016, 95% CI: -0.089 to 0.129). We chose to film the nests at this stage because this is the peak  
127 provisioning period of dunnocks (Hatchwell and Davies 1990). These recordings were also used to  
128 ascertain social group composition. We quantified male parental care as the number of visits and the  
129 number of feeds during the segment of the recordings encompassed between the first provisioning  
130 visit of any adult and finishing at the end of the recorded file (defined as effective observational time,  
131 Nakagawa et al. 2007; mean effective observational time = 2.10 hours (SD: 0.573),  $n = 158$  focal  
132 observations from 77 different nests).

### 133 **Statistics**

134 We analysed our paternal care data using Bayesian mixed-effects models (BMM), with Poisson error  
135 distribution within the package *MCMCglmm* (Hadfield 2010) for R version 3.3.0 (R Core Team 2016).  
136 Because we have reasons to expect the number of visits and the number of feeds to be proportional to  
137 the length of the observation period, we included the natural logarithm of the effective observation

138 time as an offset in the exposure Poisson BMMs, and fixed its coefficient to 1 (Snijders and Bosker  
139 2011; see Supporting Information for more details). By using the offset term, we avoided having to  
140 convert the raw count data into a ratio, thus making interpretation of the results more convenient. We  
141 included the type of social group composition (categorical with 2 levels: monogamous and  
142 polyandrous), and brood size (continuous; centred and scaled) as predictors.

### 143 *Correlation between number of visits and number of feeds*

144 First, we estimated the correlation between the number of visits and the number of feeds because these  
145 two variables are likely to be highly correlated (see Supporting Information S1 for details of bivariate-  
146 response model to estimate the correlation). We found a strong positive correlation between the  
147 number of visits and the number of feeds (posterior mean correlation:  $r_{\text{between-individual}} = 0.940$ ; 95% CI:  
148 0.753 to 0.985;  $r_{\text{within-individual}} = 0.786$ ; 95% CI: 0.681 to 0.859). Here, we present results of models  
149 using the number of visits as a measure of paternal care.

### 150 *Adjustment of paternal care*

151 As we were mainly interested in the effect of the proportion of EGY on within male paternal care, we  
152 used individual centring to separate within- versus between-individual effects in our BMMs (van de  
153 Pol and Wright 2009). This approach allowed us to quantify the effect of the proportion of EGY on  
154 paternal care among sequential broods of a particular male (within-male effect;  $n = 17$  pairs with 2 or  
155 more breeding attempts together), and to quantify the effect between males (between-male difference;  
156  $n = 66$  pairs).

157 We found evidence of within-male adjustment of care (see Result section below);  
158 monogamous males adjust their visitation rate according to the extra-pair offspring produced by their  
159 partners. Thus, we wanted to know whether this within-individual adjustment was caused by: (i)  
160 different female partners producing different numbers of extra-pair offspring; or (ii) same female  
161 partners producing different number of extra-pair offspring in successive broods with the same male.  
162 We built another model with number of visits of socially monogamous males as the response variable.

163 In this model, we used three fixed effects: within-male within pair deviation, within-male but between  
164 pair deviation, and between males. In addition to male identity and nest identity, we included pair  
165 identity as another random effect.

166 Finally, to account for the multilevel nature of our data, we included male identity and nest  
167 identity as random effects in all the models. We estimated the repeatability of paternal care in order to  
168 assess individual male consistency among different breeding attempts (see Supporting Information S1  
169 for details). We present back-transformed (original count scale) model estimates as posterior means  
170 and their 95% credible intervals (95% CI). We considered parameters with 95% CIs not spanning zero  
171 to be statistically significant.

172 To test whether males reduce paternal care or not when paternity decreases, we fit the  
173 proportion of extra-group young (EGY) in a brood as a predictor in our exposure Poisson BMM. We  
174 considered the effect of within-group paternity by subordinate co-breeding males on the paternal care  
175 of dominant and subordinate co-breeding males in separate models. These analyses were a more  
176 appropriate way to compare our findings with those of Burke et al. (1989), as in their study there was  
177 no evidence of extra-group paternity, but the authors found that dominant co-breeding males in  
178 socially polyandrous groups were more likely to feed young in broods in which they gained paternity.  
179 In order to provide a similar analysis to that conducted by Burke et al. (1989) on whether subordinate  
180 males were less likely to provide care when they gained no paternity, we also investigated whether  
181 there was a difference in the number of visits by subordinate males that gained paternity in a brood,  
182 versus those that did not gain any paternity. This analysis was achieved using an exposure Poisson  
183 BMM, fitting whether subordinate males gained paternity or not as a categorical predictor.

184 We investigated whether paternal care was beneficial to broods by estimating the effect of the  
185 relative participation by males to the total nest visitation on the proportion of young that fledged from  
186 each nest. We fit a binomial Bayesian model, in *MCMCglmm*, with the proportion of young that  
187 fledged as the response variable (we used the *cbind* function to combine the number of fledglings and



188 number of young that failed to fledge as the response variable), and the proportion of nest visits by  
189 males (centred, scaled) (Schielzeth 2010) as a continuous predictor. We also included the type of  
190 social group composition (monogamy or polyandry) as a categorical predictor in this model.

191 To assess whether paternal care is costly to males, we estimated a male's survival until the  
192 subsequent breeding season ( $n = 42$  males; three breeding seasons) as a function of the amount of  
193 paternal effort during a breeding season. Male paternal effort was estimated as his average  
194 provisioning visitation rate to all his nests during a given breeding season. We used a Cormack-Jolly-  
195 Seber survival model based on our mark-recapture data to estimate the effect of paternal effort in a  
196 given breeding season on his probability to survive until the next breeding season. We included the  
197 average number of visits per breeding season of the male as a covariate in the model and also the  
198 identity of the breeding season in order to control for any year effect that might cause biases in  
199 survival. Survival was estimated in the program *MARK* (White and Burnham 1999).

200

## 201 **Results**

### 202 **General results**

203 In total, we obtained 357 hours of paternal care footage, recorded from 66 unique nesting attempts that  
204 had paternity data available, attended by 42 and 36 unique males and females, respectively. Socially  
205 polyandrous groups accounted for 60.6% (40/66) of nesting attempts, while monogamous pairs tended  
206 the remaining 39.4% (26/66). Male number of visits increased significantly with brood size ( $\beta_{(\text{slope of brood size})} = 0.247$ , 95% CI: 0.152 to 0.334). We found that co-breeding males in social polyandry made  
207 on average 0.644 times significantly less ( $\beta_{(\text{slope of polyandrous mating system})} = -0.439$ , 95% CI: -0.681 to -  
208 0.197; Figure 1) nest visits than monogamous males after controlling for the length of the observation  
209 period and brood size. Within- and between-season repeatabilities of male number of visits were  
210 significantly different from 0, and moderate to high (between seasons repeatability of paternal care =

212 0.794; Figure 2; see Table S1 in the Supporting Information for detailed results), which indicates that  
213 males are likely to maintain their nest visitation rates among different breeding attempts. On average,  
214 monogamous males had lower between-season repeatabilities (between seasons repeatability of  
215 paternal care = 0.452) than co-breeding males (between seasons repeatability of paternal care = 0.791),  
216 but there was substantial overlap of 95% CIs.

### 217 **Paternal care and paternity**

218 We found statistically significant evidence of a within-male effect, *i.e.* a negative relationship between  
219 the proportion of extra-pair young in a brood and a male's number of visits, but only for socially  
220 monogamous males (monogamy:  $\beta_{(\text{within-male effect})} = -0.732$ , 95% CI: -1.510 to -0.047; Figure 3). There  
221 was little evidence that co-breeding males in socially polyandrous groups changed their number of  
222 visits with changes in extra-group paternity (polyandry:  $\beta_{(\text{within-male effect})} = 0.592$ , 95% CI: -0.368 to  
223 1.448; Figure 3). We found little evidence of a between-male effect of paternity on the number of  
224 visits when examining the relationship across all pair broods (monogamy:  $\beta_{(\text{between-male effect})} = 0.194$ ,  
225 95% CI: -0.531 to 0.931; polyandry:  $\beta_{(\text{between-male effect})} = -0.121$ , 95% CI: -0.943 to 0.760).

226 We found that individual monogamous males adjusted their paternal care within-pairs ( $W_{mp}$ ;  
227 monogamy:  $\beta_{(\text{within male within-pair effect})} = -1.169$ , 95% CI: -2.454 to -0.023). These males reduced their  
228 visitation rate when there were more extra-pair offspring in nests of the same female partner. The  
229 estimates for the parameter within males between-pairs was negative, but the 95% CI did span 0  
230 ( $W_{mB_p}$ ; monogamy:  $\beta_{(\text{within male between-pair effect})} = -0.665$ , 95% CI: -1.735 to 0.361).

231 In socially polyandrous groups, specifically, we found little evidence of an effect of the  
232 proportion of young sired by subordinate males on the number of visits by dominant males ( $\beta_{(\text{within-pair effect})} = -0.346$ , 95% CI: -0.836 to 0.202;  $\beta_{(\text{between-pair effect})} = 0.054$ , 95% CI: -0.924 to 0.985).

234 Additionally, the proportion of young sired by subordinate males had little effect on their own number  
235 of nest visits in socially polyandrous groups ( $\beta_{(\text{within-pair effect})} = -0.177$ , 95% CI: -0.921 to 0.589;  $\beta_{(\text{between-pair effect})} = -0.674$ , 95% CI: -3.475 to 2.186). Finally, there was little evidence of a difference in the  
236

237 number of nest visits by subordinate co-breeding males in social polyandry when they gained paternity  
238 or not in a brood ( $\beta_{(\text{intercept})} = 0.864$ , 95% CI: 0.509 to 1.291;  $\beta_{(\text{gained paternity})} = -0.085$ , 95% CI: -0.532 to  
239 0.381).

#### 240 **Paternal care: its benefits to offspring and its costs to paternal males**

241 We found evidence that increments in male relative participation to total nest visitation increased  
242 fledging success in monogamous broods ( $\beta_{(\text{scaled proportion male nest visits})} = 1.942$ , 95% CI: 0.139 to 3.846;  
243 Figure 4), but not in polyandrous broods ( $\beta_{(\text{scaled proportion male nest visits})} = 0.526$ , 95% CI: -0.572 to 1.844).  
244 There was little evidence that a male's paternal effort influenced his own survival until the next  
245 breeding season (mean male survival = 0.892, 95% CI: 0.776 to 0.990;  $\beta_{(\text{paternal effort})} = -0.146$ , 95% CI:  
246 -1.069 to 0.796).

#### 247 **Discussion**

248 In this study, we tested whether dunnoek males reduce their paternal care (*i.e.*, certainty of paternity  
249 hypothesis) or not when their paternity decreases. We used a dataset with repeated observations and  
250 genetic paternity in order to address this question. Our results corroborate the certainty of paternity  
251 hypothesis, but only partially. We found evidence that socially monogamous males reduced paternal  
252 care when they lost paternity to extra-pair sires. Nevertheless, such an effect only occurred when  
253 investigating the certainty of paternity hypothesis between broods of the same breeding pair (within-  
254 male within-pair effect). We found little evidence of a between-pair effect. Below we discuss some of  
255 the implications of our findings.

256 Our results indicate that when within-male paternal care adjustment occurs – in socially  
257 monogamous males –, it is likely in response to changes in the extra-pair behaviour of their female  
258 partners. Which in turn suggests that socially monogamous males may be able to use information to  
259 determine how much to invest in a brood. Our findings are in contrast with predictions from a sealed-  
260 bid model (Houston and Davies 1985), in which paternal care levels would be optimized over  
261 evolutionary time. Yet, we did not find evidence that co-breeding males in socially polyandrous

262 groups adjust their levels of care. This evidence from co-breeding males is in line with predictions  
263 from a sealed-bid model. Combined, the findings of adjustment of paternal care in socially  
264 monogamous males, and lack of adjustment in co-breeding males – in the same population – provide  
265 an interesting case about the organization of parental care with regards to behavioural flexibility. Our  
266 study indicates that the ability to adjust paternal provisioning behaviour is modulated by the breeding  
267 status of male dunnocks (see Holtmann et al. 2015 for more details about breeding status).  
268 Interestingly, our observations lead to a situation analogous to the “negotiation continuum” over the  
269 supply of provisioning behaviour (Hinde and Kilner 2007) in within-population context.

270           In addition to the within-male within-pair adjustment of paternal care exhibited by socially  
271 monogamous males, we found that these males’ relative participation in nest visitation has an  
272 important effect on fledging success. The combination of these two findings indicates that when  
273 socially monogamous females engage in extra-pair behaviour, they put their own broods at risk.  
274 Recently, Schroeder et al. (2016) found that male house sparrows adjust their levels of paternal care in  
275 relation to cuckoldry. However, differently from our study, Schroeder et al. (2016) found that the  
276 adjustment occurred when males changed partners that consistently differed in their levels of  
277 cuckoldry. Yet, what both studies have in common is evidence that males adjust care when cuckold,  
278 leading to costs to females (this study). Our findings, along with studies that have shown that females  
279 suffer indirect costs when producing extra-pair offspring (Hsu et al. 2015) call for further theoretical  
280 investigations of female infidelity.

281           Interestingly, our results do not bear similarities to another dunnock study. Davies et al.  
282 (1992) did not find evidence that the experimental removal (and subsequent loss of paternity to extra-  
283 pair males) of monogamous males from their territories during the mating period—before egg-  
284 laying—altered their provisioning behaviour. A simple explanation for the divergence between the  
285 results could be the fact that only two monogamous males were experimentally removed in Davies et  
286 al. (1992) during the period before laying. It is likely that such a small sample size would not be  
287 sufficient to detect an effect. Moreover, as we have shown in our study, the reduction in paternal care

288 was only observed within-males within-pairs, thus, Davies et al. (1992) would not have been able to  
289 detect the effect under their experimental design.

290           Contrary to Burke et al. (1989), which reported that polyandrous males that gained paternity  
291 in their broods (dominant vs. subordinate males) were more likely to feed offspring than males that did  
292 not gain paternity, we found little evidence that polyandrous males adjusted their levels of care in  
293 relation to loss of paternity to both subordinate and extra-group males. Furthermore, the repeatability  
294 of paternal care was high among co-breeding males in socially polyandrous groups, indicating that  
295 males consistently provided similar levels of care in different breeding attempts. Given the previous  
296 findings and the biology of dunnocks, we found our results to be unexpected. We could simply  
297 attribute the discrepancy to differences in demography, and ecology between the two populations (our  
298 study vs. the Cambridge study). Nevertheless, we expected that co-breeding male dunnocks would be  
299 able to assess their risk of being cuckolded (i.e. having information on female promiscuity), because  
300 of the high levels of mate guarding in this species (see Davies 1992). Possibly, males have information  
301 about the risk of being cuckolded, but lack the ability to recognize their own offspring in a brood.  
302 Thus, adjustment of paternal care could be maladaptive, because males would reduce care to their own  
303 young, thus directly decreasing their own fitness. Nevertheless, our results of lack of adjustment and  
304 high repeatability among co-breeding males are consistent with the prediction of the sealed-bid  
305 hypothesis (Houston and Davies 1985) that ‘negotiation’ over how much care to provide occurs over  
306 evolutionary time (Houston and Davies 1985) (e.g., Schwagmeyer et al. 2002; Nakagawa et al. 2007).  
307 Under this scenario, changes in paternity between breeding attempts of a male should not influence  
308 how much care he provides.

309           Similarly to dunnocks, in the reed bunting, *Emberiza schoeniclus*, an early study found  
310 evidence for the certainty of paternity hypothesis (Dixon et al. 1994), whereas a more recent  
311 investigation did not (Bouwman 2005). In the latest reed bunting study (Bouwman 2005), the authors  
312 discussed three assumptions from theoretical models that need to be met in order for males to adjust  
313 care in relation to paternity. Succinctly (refer to Bouwman et al. 2005 for a detailed discussion), these

314 assumptions are that: i) levels of paternity need to vary between breeding attempts of a male; ii) males  
315 should be able to assess their share of paternity through behavioural cues (e.g., absence of female  
316 during her fertile period or number of intruding males); and iii) the benefits of reducing care should  
317 outweigh the costs. The first assumption is not contentious throughout most studies, as levels of  
318 paternity vary considerably among broods (reviewed in Griffith et al. 2002). However, evidence  
319 supporting the other two assumptions is debatable. Our findings suggest that under some  
320 circumstances (social monogamy, within-pair effect), males adjust their paternal care when paternity  
321 is lost to extra-pair sires. These results indicate that these males may use cues provided by females to  
322 adjust the amount of care provided. However, it is worth noting that the within-pair reduction of care  
323 could also be triggered by other factors associated with the identity of individual females, such as their  
324 breeding condition, which could affect her share of parental care towards the brood. Disentangling the  
325 effects of factors associated with female identity from variation in extra-pair paternity would yield  
326 interesting insights into the mechanisms that cause males to reduce their paternal care. The third  
327 assumption that males should benefit from reducing their care can also be questioned. Our results  
328 suggest that males do not suffer mortality costs of providing paternal care. This finding is in  
329 agreement with a recent meta-analysis that has shown that in birds, males do not gain benefits in terms  
330 of their own survival to the next breeding season when paternal effort is experimentally reduced  
331 (Santos and Nakagawa 2012; but see Magrath and Komdeur 2003 for a discussion of benefits in terms  
332 of additional mating opportunities).

333 In conclusion, our results show that males are able to adjust their paternal contribution, but  
334 only under specific conditions. Monogamous males adjust their paternal investment within-pairs, and  
335 this may have important fitness consequences to the extra-pair offspring, as the amount of paternal  
336 care provided is associated with fledging success. Co-breeding males in socially polyandrous groups  
337 did not adjust their levels of paternal care according to variation in paternity. Taken together, our  
338 results raise the question of what causes socially monogamous—but not co-breeding males in social  
339 polyandry—to adjust paternal care when paternity changes when paired to the same female. Finally,

340 females in social monogamy that engage in extra-pair behaviour face important fitness costs, as their  
341 partners' reduction in care has negative consequences to nestling fledging success.

342

### 343 **Acknowledgements**

344 We thank the Dunedin Botanic Garden, its staff, especially Barbara Wheeler, for allowing us to  
345 conduct our research on their grounds; Delphine Scheck, Patrick Crowe, Sam van der Horst, Luana L.  
346 S. Santos, and Sophie Gibson for field assistance; Luana L. S. Santos, Losia Lagisz and Karin Ludwig  
347 for their valuable help with laboratory analyses; Lonneke Kamphues and Sophie Gibson for helping to  
348 watch the parental care videos; Deborah Dawson, Andy Krupa, Daichi Saito and Isao Nishiumi for  
349 providing primer aliquots; Gustavo Requena, and Diogo Melo for thoughtful comments on an earlier  
350 version of this manuscript. ESAS received a University of Otago postgraduate scholarship, SN held a  
351 Marsden grant (UOO-0812) and a Rutherford Discovery Fellowship, and ESAS and SN received an  
352 Association for the Study of Animal Behaviour research grant.

353

### 354 **References**

- 355 Bouwman, K. M. (2005). Male reed buntings do not adjust parental effort in relation to extrapair  
356 paternity. *Behavioral Ecology*, 16, 499–506. doi: 10.1093/beheco/ari021
- 357 Burke, T., Davies, N. B., Bruford, M. W., & Hatchwell, B. J. (1989). Parental care and mating  
358 behavior of polyandrous dunnocks *Prunella modularis* related to paternity by DNA  
359 fingerprinting. *Nature*, 338, 249–251. doi: 10.1038/338249a0
- 360 Coleman, S. W., & Jones, A. G. (2011). Patterns of multiple paternity and maternity in fishes.  
361 *Biological Journal of the Linnean Society*, 103, 735–760. doi: 10.1111/j.1095-8312.2011.01673.x
- 362 Davies, N. B. (1992). *Dunnock behaviour and social evolution*. Oxford, UK: Oxford University Press
- 363 Dixon, A., Ross, D., O'Malley, S. L. C., & Burke, T. (1994). Paternal investment inversely related to  
364 degree of extra-pair paternity in the reed bunting. *Nature*, 371, 698–700. doi: 10.1038/371698a0
- 365 Forstmeier, W., Nakagawa, S., Griffith, S. C., & Kempenaers, B. (2014). Female extra-pair mating:  
366 adaptation or genetic constraint? *Trends in Ecology and Evolution*, 29, 456–64. doi:  
367 10.1016/j.tree.2014.05.005
- 368 Grafen, A. (1980). Opportunity cost, benefit and degree of relatedness. *Animal Behaviour*, 28, 967–  
369 968. doi: 10.1016/s0003-3472(80)80160-6
- 370 Griffin, A. S., Alonzo, S. H., & Cornwallis, C. K. (2013). Why do cuckolded males provide paternal  
371 care? *PLoS Biology*, 11, e1001520. doi: 10.1371/journal.pbio.1001520
- 372 Griffith, S. C., Owens, I. P. F., & Thuman, K.A. (2002). Extra pair paternity in birds: a review of  
373 interspecific variation and adaptive function. *Molecular Ecology*, 11, 2195–2212. doi:  
374 10.1046/j.1365-294X.2002.01613.x

- 375 Hadfield, J. D. (2010). MCMC methods for multi-response generalized linear mixed models: the  
376 MCMCglmm R package. *Journal of Statistical Software*, 33, 1–22. doi: 10.18637/jss.v033.i02
- 377 Hadfield, J. D., Richardson, D. S., & Burke, T. (2006). Towards unbiased parentage assignment:  
378 combining genetic, behavioural and spatial data in a Bayesian framework. *Molecular Ecology*, 15,  
379 3715–3730. doi: 10.1111/j.1365-294X.2006.03050.x
- 380 Hamilton, W. D. (1964a). The genetical evolution of social behaviour. I. *Journal of Theoretical*  
381 *Biology*, 7, 1–16. doi: 10.1016/0022-5193(64)90038-4
- 382 Hamilton, W. D. (1964b). The genetical evolution of social behaviour. II. *Journal of Theoretical*  
383 *Biology*, 7, 17–52. doi: 10.1016/0022-5193(64)90039-6
- 384 Hatchwell, B. J., & Davies, N. B. (1990). Provisioning of nestlings by dunnocks, *Prunella modularis*,  
385 in pairs and trios: compensation reactions by males and females. *Behavioral Ecology and*  
386 *Sociobiology*, 27, 199–209. doi: 10.1007/BF00180304
- 387 Hinde, C. A., & Kilner, R. M. (2007). Negotiations within the family over the supply of parental care.  
388 *Proceedings of the Royal Society of London B*, 274, 53–60. doi: 10.1098/rspb.2006.3692
- 389 Holtmann, B., Grosser, S., Lagisz, M., Johnson, S. L., Santos, E. S. A., Lara, C. E., ... Nakagawa, S.  
390 (2016). Population differentiation and behavioural association of the two 'personality' genes  
391 *DRD4* and *SERT* in dunnocks (*Prunella modularis*). *Molecular Ecology*, 25, 706–722. doi:  
392 10.1111/mec.13514
- 393 Houston, A. I., & Davies, N. B. (1985). The evolution of cooperation and life-history in the dunnock,  
394 *Prunella modularis*. In: Sibly, R. M., & Smith, R. H. (eds) *Behavioural ecology ecological*  
395 *consequences of adaptive behaviour*. Oxford, UK, pp 471–487.
- 396 Hsu, Y. H., Schroeder, J., Winney, I., Burke, T., & Nakagawa, S. (2014). Costly infidelity: low  
397 lifetime fitness of extra-pair offspring in a passerine bird. *Evolution*, 68, 2873–2884. doi:  
398 10.1111/evo.12475
- 399 Johnstone, R. A. (1997). Recognition and the evolution of distinctive signatures: when does it pay to  
400 reveal identity? *Proceedings of the Royal Society of London B*, 264, 1547–1553. doi:  
401 10.1098/rspb.1997.0215
- 402 Kempnaers, B., & Sheldon, B. C. (1997). Studying paternity and paternal care: Pitfalls and problems.  
403 *Animal Behaviour*, 53, 423–427. doi: 10.1006/anbe.1996.0377
- 404 Kempnaers, B., & Sheldon, B. C. (1998). Confounded correlations: a reply to Lifjeld et al. and  
405 Wagner et al. *Animal Behaviour*, 55, 241–244. doi: 10.1006/anbe.1997.0607
- 406 Klug, H., Alonzo, S. H., & Bonsall, M. B. (2012). Theoretical foundations of parental care. In: Royle,  
407 N. J., Smiseth, P. T., & Kölliker, M. (eds) *The evolution of parental care*. Oxford University  
408 Press, Oxford, UK, pp 21–39
- 409 Lifjeld, J. T., Anthonisen, K., Blomqvist, D., Johnsen, A., Krokene, C., & Rigstad, K. (1998).  
410 Studying the influence of paternity on paternal effort: a comment on Kempnaers & Sheldon.  
411 *Animal Behaviour*, 55, 235–238. doi: 10.1006/anbe.1997.0606
- 412 Magrath, M., & Komdeur, J. (2003). Is male care compromised by additional mating opportunity?  
413 *Trends in Ecology and Evolution*, 18, 424–430. doi: 10.1016/S0169-5347(03)00124-1



- 414 Maynard Smith, J. (1978). The evolution of sex. Cambridge, UK: Cambridge University Press.
- 415 Moulton, M. P., Santos, E. S. A., Cropper Jr., W. P., & Lim, J. N. (2014). New records for passerine  
416 introductions to the Otago acclimatisation region in New Zealand. *Notornis*, 61, 219–222.
- 417 Nakagawa, S., Gillespie, D. O. S., Hatchwell, B. J., & Burke, T. (2007). Predictable males and  
418 unpredictable females: sex difference in repeatability of parental care in a wild bird population.  
419 *Journal of Evolutionary Biology*, 20, 1674–1681. doi: 10.1111/j.1420-9101.2007.01403.x
- 420 Pipek, P., Pyšek, P., & Blackburn, T.M. (2015). A clarification of the origins of birds released by the  
421 Otago Acclimatisation Society from 1876 to 1882. *Notornis*, 62, 105–112.
- 422 R Core Team (2016). R: A language and environment for statistical computing. R Foundation for  
423 Statistical Computing, Vienna, Austria. <https://www.R-project.org/>
- 424 Royle, N. J., Smiseth, P. T., & Kölliker, M. (2012). The evolution of parental care. Oxford, UK:  
425 Oxford University Press.
- 426 Santos, E. S. A. (2012). Discovery of previously unknown historical records on the introduction of  
427 dunnocks (*Prunella modularis*) into Otago, New Zealand during the 19<sup>th</sup> century. *Notornis*, 59,  
428 79–81.
- 429 Santos, E. S. A., Jamieson, I. G., Santos, L. L. S., & Nakagawa, S. (2013). Low genetic and  
430 morphological differentiation between an introduced population of dunnocks in New Zealand and  
431 an ancestral population in England. *Biological Invasions*, 15, 185–197. doi: 10.1007/s10530-012-  
432 0278-x
- 433 Santos, E. S. A., & Nakagawa, S. (2012). The costs of parental care: a meta-analysis of the trade-off  
434 between parental effort and survival in birds. *Journal of Evolutionary Biology*, 25, 1911–1917.  
435 doi: 10.1111/j.1420-9101.2012.02569.x
- 436 Santos, E. S. A., & Nakagawa, S. (2013). Breeding biology and variable mating system of a  
437 population of introduced dunnocks (*Prunella modularis*) in New Zealand. *PLoS ONE*, 8, e69329.  
438 doi: 10.1371/journal.pone.0069329
- 439 Santos, E. S. A., Santos, L. L. S., Lagisz, M., & Nakagawa, S. (2015a). Conflict and cooperation over  
440 sex: the consequences of social and genetic polyandry for reproductive success in dunnocks.  
441 *Journal of Animal Ecology*, 84, 1509–1519. doi: 10.1111/1365-2656.12432
- 442 Santos, E. S. A., Santos, L. L. S., Lagisz, M., & Nakagawa, S. (2015b). Conflict and cooperation over  
443 sex: the consequences of social and genetic polyandry for reproductive success in dunnocks -  
444 Dataset. figshare. <https://doi.org/10.6084/m9.figshare.1500791.v4>
- 445 Schielzeth, H. (2010). Simple means to improve the interpretability of regression coefficients.  
446 *Methods in Ecology and Evolution*, 1, 103–113. doi: 10.1111/j.2041-210X.2010.00012.x
- 447 Schroeder, J., Hsu, Y.H., Winney, I., Simons, M., Nakagawa, S., & Burke, T. (2016). Predictably  
448 philandering females prompt poor paternal provisioning. *The American Naturalist*, 188, 219–230.  
449 doi: 10.1086/687243
- 450 Schwagmeyer, P. L., Mock, D. W., & Parker, G. A. (2002). Biparental care in house sparrows:  
451 Negotiation or sealed bid? *Behavioral Ecology*, 13, 713–721. doi: 10.1093/beheco/13.5.713

- 452 Sheldon, B. C. (2002). Relating paternity to paternal care. *Philosophical Transactions of the Royal*  
453 *Society of London B*, 357, 341–350. doi: 10.1098/rstb.2001.0931
- 454 Smiseth, P. T., Kölliker, M., & Royle, N. J. (2012). What is parental care? In: Royle, N. J., Smiseth, P.  
455 T., & Kölliker, M. (eds) *The evolution of parental care*. Oxford University Press, Oxford, UK, pp  
456 1–17.
- 457 Snijders, T. A. B., & Bosker, R. J. (2011). *Multilevel Analysis*, 2nd edn. London, UK: Sage  
458 Publications.
- 459 Trivers, R. L. (1972). Parental investment and sexual selection. In: Campbell, B. (ed) *Sexual selection*  
460 *and the descent of man*. Chicago, IL, pp 136–179.
- 461 Uller, T., & Olsson, M. (2008). Multiple paternity in reptiles: patterns and processes. *Molecular*  
462 *Ecology*, 17, 2566–2580. doi: 10.1111/j.1365-294X.2008.03772.x
- 463 van de Pol, M., & Wright, J. (2009). A simple method for distinguishing within- versus between-  
464 subject effects using mixed models. *Animal Behaviour*, 77, 753–758. doi: 10.1016/j.anbehav.20
- 465 Wagner, R. H., Schug, M. D., & Morton, E. S. (1998). Studying paternity and paternal care: the value  
466 of negative results. *Animal Behaviour*, 55, 239–240. doi: 10.1006/anbe.1997.0605
- 467 Westneat, D. F., & Sherman, P. W. (1993). Parentage and the evolution of parental behavior.  
468 *Behavioral Ecology*, 4, 66–77. doi: 10.1093/beheco/4.1.66
- 469 White, G. C., & Burnham, K. P. (1999). Program MARK: survival estimation from populations of  
470 marked animals. *Bird Study*, 46, S120–S139. doi: 10.1080/00063659909477239
- 471 Whittingham, L. A., Taylor, P. D., & Robertson, R. J. (1992). Confidence of paternity and male  
472 parental care. *The American Naturalist*, 139, 1115–1125. doi: 10.1086/285376
- 473 Xia, X. (1992). Uncertainty of paternity can select against paternal care. *The American Naturalist*,  
474 139, 1126–1129. doi: 10.1086/285377
- 475
- 476

477 **Supporting information**

478 **Supporting information S1** Supplementary methods, tables and figures.

479

480 **Data accessibility**

481 Data used in this manuscript will be made available in the **figshare** repository upon acceptance of the  
482 paper.

483

484 **Author contributions**

485 ESAS conceived the study; ESAS and SN designed the study; ESAS collected the data, conducted  
486 laboratory analyses and analysed the data; ESAS and SN wrote and edited the manuscript.

487

488 **Figures**

489 **Figure 1**

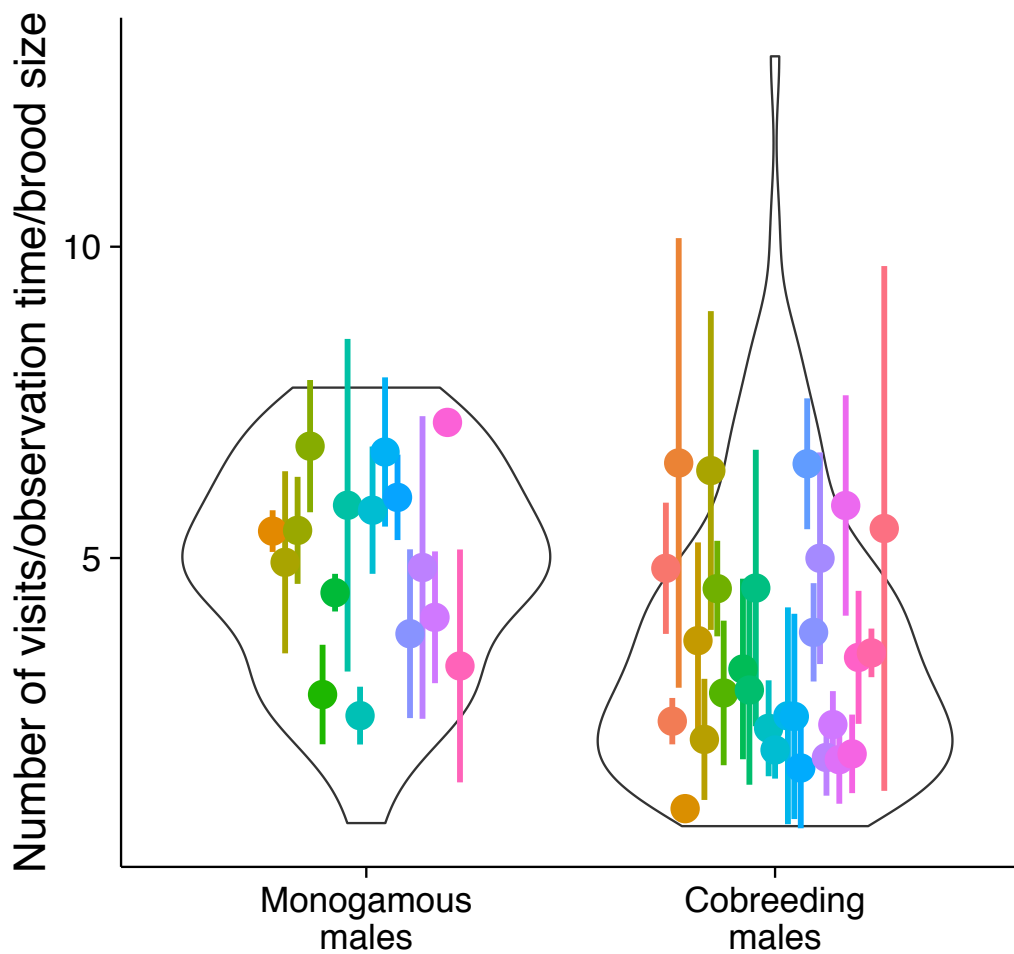

490

491 **Fig. 1** Number of nest visits by the duration of the parental care observation period made by  
492 monogamous, and co-breeding males in social polyandry (the y-axis is presented for visualization  
493 purpose; we used raw count data in our statistical models). Dots represent the mean number of visits  
494 per observation for each male (vertical bars are  $\pm 1$  SD; each male is coloured with a different shade).  
495 The envelopes show the density of the data for each male mating category.

496

497 **Figure 2**

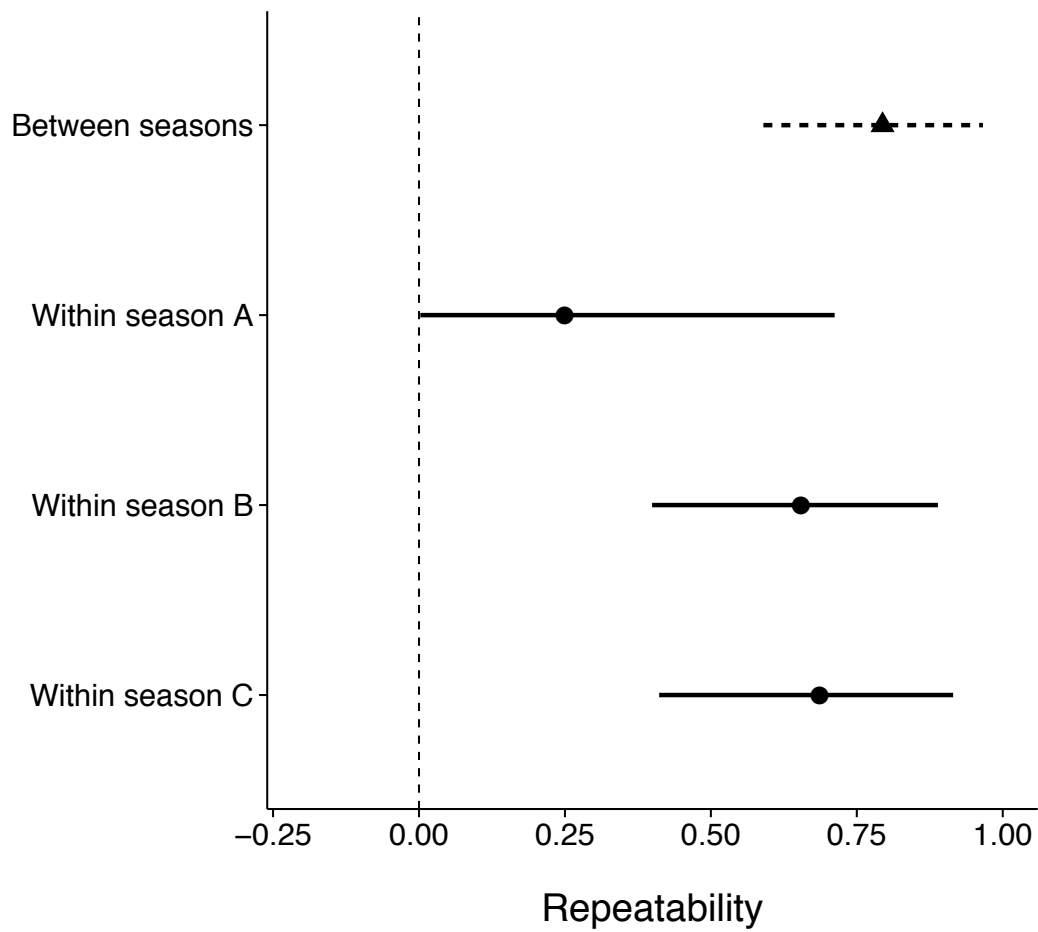

498

499 **Fig. 2** Within- and between-season repeatability estimates of the number of visits to a nest by male  
500 dunnocks. Point estimates represent posterior mean repeatabilities and horizontal bars are the 95%  
501 credible intervals. Estimates with 95% credible intervals that do not touch or overlap the vertical  
502 dashed line (0) are significantly repeatable. Season A: 2009–2010 (n = 28); season B: 2010–2011 (n =  
503 79); and season C: 2011–2012 (n = 51).

504

505 **Figure 3**

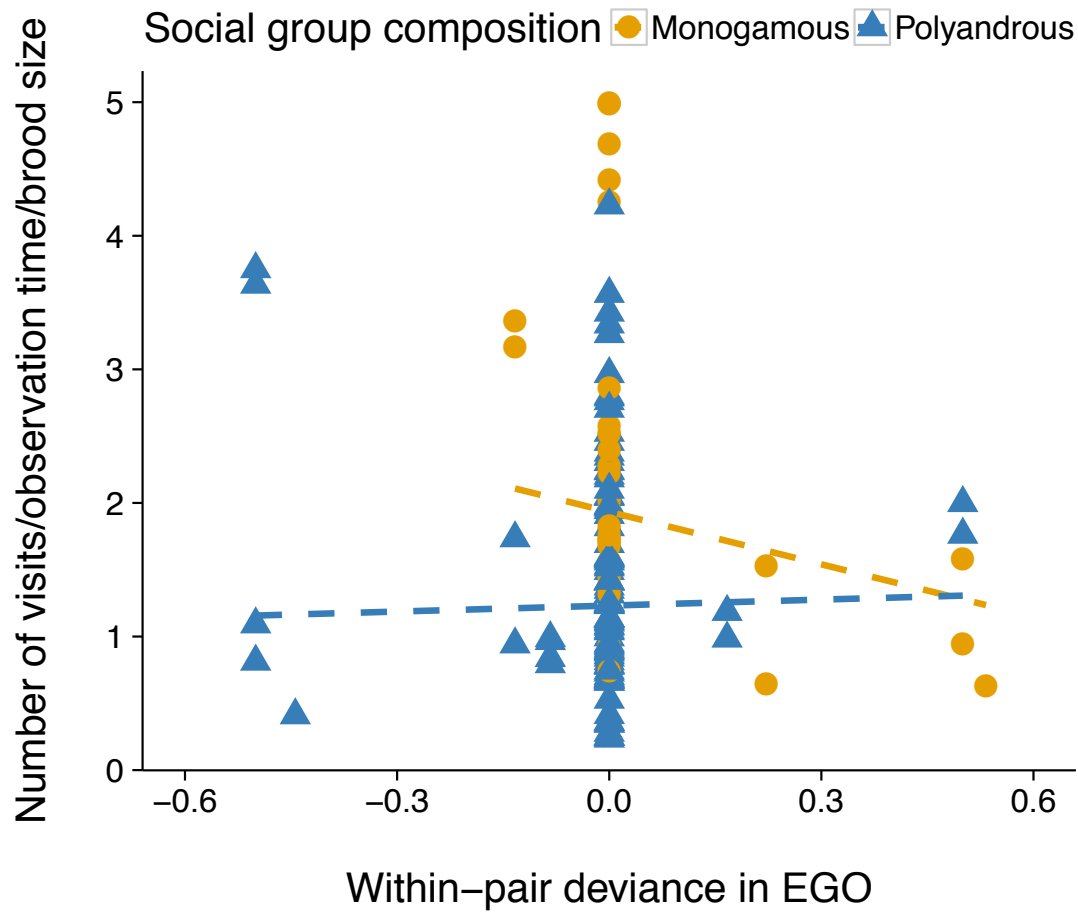

506

507 **Fig. 3** Relationship between the within-pair deviance in the proportion of extra-group offspring (EGO)  
508 in broods and male number of visits to a nest. All male-female pairs that did not show variance  
509 between breeding attempts in the proportion of extra-group offspring are spread vertically at  $x = 0$ .  
510 Orange and blue symbols and lines represent males in socially monogamous ( $n = 46$  observations) and  
511 socially polyandrous ( $n = 112$  observations) groups, respectively. Lines represent predicted results  
512 from Poisson Bayesian mixed model with *Male identity* and *Nest identity* as random effects (posterior  
513 means and 95% CI): 0.172 (0.082 to 0.293) and 0.027 (0.0003 to 0.073), respectively.

514

515 **Figure 4**

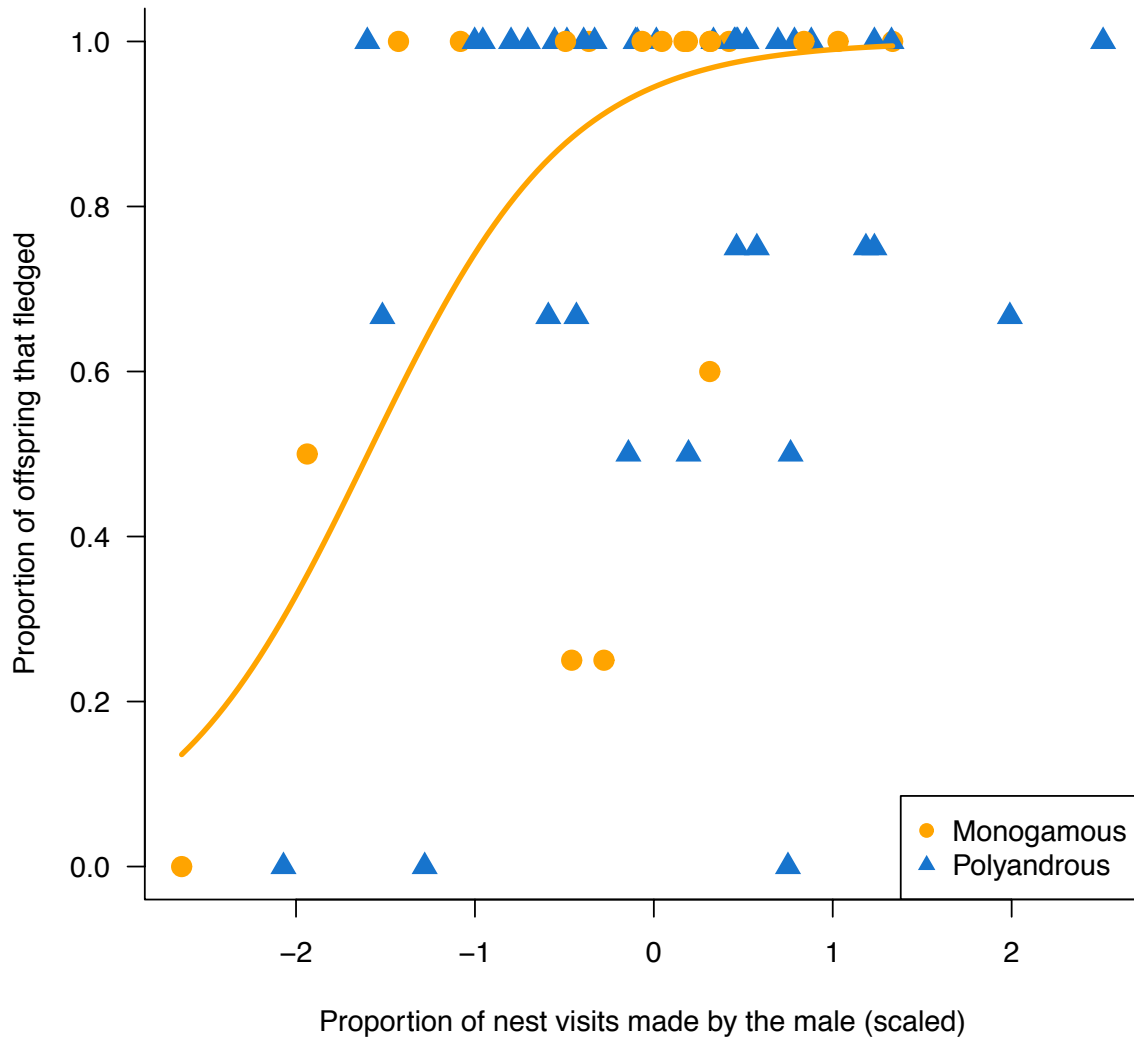

516

517 **Fig. 4** Relationship between the proportion of male visits to a nest (relative participation to total nest  
518 visitation; scaled and centred) and the proportion of young that fledged. Orange and blue symbols  
519 represent males in socially monogamous (n = 19 observations) and socially polyandrous (n = 37  
520 observations) groups, respectively. The orange line represents predicted results from a binomial  
521 Bayesian model for monogamous males.
